# Supplementary material
Source: MDPI journal article supplement (https://www.mdpi.com/2073-4433/13/9/1377)
Supplement: s1 [file s1]

## 1. The Principle of XGBoost

XGBoost can also help address the overfitting, support the parallelization of tree construction and speed up the execution, which is able to increase forecasting accuracy. It can be described as Equation (1):

$$\hat{y} = \sum_{k=1}^K f_k(x_i), f_k \in F \quad (S1)$$

where  $\hat{y}$  is the predicted value of the  $i$ th sample,  $K$  is the number of trees,  $f_k$  is the structure of the  $k$ th tree and the weight of the leaf node,  $x_i$  is the eigenvalue of the  $i$ th sample, and  $i = 1, \dots, N$ ,  $F$  is the set of all trees.

To find the minimized objective function, performing Taylor's second-order expansion on the  $t$ th objective function  $f_{obj}^{(t)}(x_i)$  when  $f_{obj}^{(t)}(x_i) = 0$ . The approximate objective function can be expressed as follows:

$$f_{obj}^{(t)} \approx \sum_{i=1}^N [L(y_i, \hat{y}_i^{(t-1)}) + g_{i,t} f_{i,t}(x_i) + \frac{1}{2} h_{i,t} f_{i,t}^2(x_i)] + \Omega(f_t) + C \quad (S2)$$

where  $g = \partial_{\hat{y}} L(y_i, \hat{y}_i^{(t-1)})$ ,  $h = \partial_{\hat{y}}^2 L(y_i, \hat{y}_i^{(t-1)})$ .

Regularizing the complexity of the algorithm in the objective function can prevent the algorithm from overfitting. The structure of the tree is defined as  $q$ , the weight of the leaf nodes is  $w$ . The algorithm complexity is defined as the sum of the squares of the nodes in each tree and the real fraction values corresponding to the leaf nodes. The expression can be shown in Equation (3):

$$\Omega(f_t) = \gamma T + \frac{1}{2} \lambda \sum_{j=1}^T w_j^2 \quad (S3)$$

where  $\gamma$  is used to control the number of leaf nodes,  $T$  is the number of leaf nodes, and  $\lambda$  is used to control the weight of leaf nodes. The adjusted objective function expression is given in Equation (4):

$$f_{obj}^{(t)} = \sum_{j=1}^T [(\sum_{i \in I_j} g_i) w_j + \frac{1}{2} \sum_{i \in I_j} (h_i + \lambda) w_j^2] + \gamma T \quad (S4)$$

where  $I_j = \{i | q(x_i) = j\}$  is used to represent the sample set in each leaf in the  $j$ th tree.

Redefining  $G = \sum_{j=1}^T \sum_{i \in I_j} g_i$  and  $H = \frac{1}{2} \sum_{j=1}^T \sum_{i \in I_j} (h_i + \lambda)$ , the objective function  $f_{obj}^{(t)}$  is transformed is a one-variable quadratic function, and the optimal  $w$  and objective function value are obtained by solving it. The objective function is used as the scoring function of the algorithm. The solution expression is given in Equation (5) – (6):

$$w_j^* = - \frac{G_j}{H_j + \lambda} \quad (S5)$$

$$f_{obj} = - \frac{1}{2} \sum_{j=1}^T \frac{G_j^2}{H_j + \lambda} + \gamma T \quad (S6)$$

where  $w_j^*$  is used to represent the optimal value of  $w$  and  $f_{obj}$  is the final objective function.

**Table S1.** The relevant statistical analysis of the annual concentrations of PM<sub>2.5</sub> in 2017 in Henan Province, Hubei Province and Hunan Province.

| Province       | City | MIN   | MAX   | RANGE | MEAN  | STD   |
|----------------|------|-------|-------|-------|-------|-------|
| Henan Province | ZZ   | 39.10 | 75.30 | 36.20 | 61.91 | 8.94  |
| Henan Province | KF   | 56.20 | 73.40 | 17.20 | 63.60 | 3.37  |
| Henan Province | LY   | 25.00 | 73.70 | 48.70 | 46.23 | 12.26 |
| Henan Province | PDS  | 29.40 | 68.60 | 39.20 | 56.12 | 8.11  |
| Henan Province | AY   | 34.90 | 81.80 | 46.90 | 65.02 | 8.24  |
| Henan Province | HB   | 45.80 | 73.60 | 27.80 | 64.31 | 3.61  |
| Henan Province | XX   | 31.70 | 71.00 | 39.30 | 62.87 | 5.57  |
| Henan Province | JZ   | 37.60 | 78.30 | 40.70 | 68.43 | 6.07  |
| Henan Province | PY   | 57.00 | 80.50 | 23.50 | 65.40 | 2.51  |
| Henan Province | XC   | 43.00 | 68.10 | 25.10 | 61.03 | 3.95  |
| Henan Province | LH   | 57.70 | 66.60 | 8.90  | 61.37 | 1.46  |
| Henan Province | SMX  | 29.20 | 64.70 | 35.50 | 41.14 | 9.25  |
| Henan Province | NY   | 25.20 | 58.90 | 33.70 | 45.92 | 7.44  |
| Henan Province | SQ   | 54.10 | 67.60 | 13.50 | 59.15 | 2.13  |
| Henan Province | XY   | 31.00 | 58.50 | 27.50 | 48.16 | 6.12  |
| Henan Province | ZK   | 53.10 | 63.40 | 10.30 | 57.58 | 1.65  |
| Henan Province | ZMD  | 39.50 | 62.40 | 22.90 | 53.14 | 4.15  |
| Henan Province | JY   | 31.80 | 69.50 | 37.70 | 54.97 | 7.78  |
| Hubei Province | WH   | 38.40 | 59.60 | 21.20 | 50.64 | 4.05  |
| Hubei Province | HS   | 31.70 | 55.60 | 23.90 | 44.35 | 4.63  |
| Hubei Province | SY   | 19.80 | 47.30 | 27.50 | 31.67 | 5.39  |
| Hubei Province | YC   | 20.50 | 58.20 | 37.70 | 37.55 | 9.71  |
| Hubei Province | XY   | 23.90 | 66.00 | 42.10 | 43.86 | 10.40 |
| Hubei Province | EZ   | 43.50 | 55.30 | 11.80 | 50.41 | 2.77  |
| Hubei Province | JM   | 35.00 | 60.40 | 25.40 | 47.29 | 5.69  |
| Hubei Province | XG   | 37.20 | 59.10 | 21.90 | 48.21 | 5.12  |
| Hubei Province | JZ   | 31.10 | 58.70 | 27.60 | 50.64 | 3.25  |
| Hubei Province | HG   | 25.90 | 52.90 | 27.00 | 40.29 | 5.45  |
| Hubei Province | XN   | 30.20 | 55.70 | 25.50 | 39.69 | 4.67  |
| Hubei Province | SZ   | 35.70 | 49.70 | 14.00 | 42.39 | 2.78  |
| Hubei Province | ES   | 21.10 | 41.60 | 20.50 | 28.96 | 3.50  |
| Hubei Province | XT   | 46.90 | 56.00 | 9.10  | 51.94 | 1.73  |
| Hubei Province | QJ   | 47.50 | 53.00 | 5.50  | 50.43 | 1.05  |
| Hubei Province | TM   | 47.10 | 56.30 | 9.20  | 50.89 | 1.56  |
| Hubei Province | SNJ  | 19.40 | 31.20 | 11.80 | 24.43 | 1.54  |
| Hunan Province | CS   | 30.70 | 57.40 | 26.70 | 43.21 | 5.37  |
| Hunan Province | ZZ   | 24.70 | 55.20 | 30.50 | 39.46 | 6.61  |
| Hunan Province | XT   | 35.70 | 56.10 | 20.40 | 47.51 | 4.34  |
| Hunan Province | HY   | 32.60 | 51.00 | 18.40 | 43.23 | 2.87  |

**Table S1.** *Cont.*

| Province       | City | MIN   | MAX   | RANGE | MEAN  | STD  |
|----------------|------|-------|-------|-------|-------|------|
| Hunan Province | SY   | 27.30 | 53.90 | 26.60 | 37.79 | 5.73 |
| Hunan Province | YUY  | 33.30 | 53.50 | 20.20 | 42.77 | 5.10 |
| Hunan Province | CD   | 23.60 | 55.00 | 31.40 | 42.27 | 6.64 |
| Hunan Province | ZJJ  | 23.00 | 46.90 | 23.90 | 33.28 | 4.38 |
| Hunan Province | YIY  | 29.00 | 54.20 | 25.20 | 40.11 | 6.97 |
| Hunan Province | CZ   | 24.30 | 42.70 | 18.40 | 33.92 | 4.49 |
| Hunan Province | YZ   | 29.00 | 49.40 | 20.40 | 39.11 | 3.86 |
| Hunan Province | HY   | 27.20 | 40.40 | 13.20 | 33.29 | 2.25 |
| Hunan Province | LD   | 29.50 | 48.20 | 18.70 | 39.75 | 4.05 |
| Hunan Province | XX   | 23.80 | 38.10 | 14.30 | 28.97 | 2.31 |

**Table S2.** The relevant statistical analysis of the annual concentrations of PM<sub>2.5</sub> in 2018 in Henan Province, Hubei Province and Hunan Province.

| Province       | City | MIN   | MAX   | RANGE | MEAN  | STDEV |
|----------------|------|-------|-------|-------|-------|-------|
| Henan Province | ZZ   | 32.20 | 68.30 | 36.10 | 55.45 | 8.69  |
| Henan Province | KF   | 53.70 | 69.10 | 15.40 | 60.96 | 2.79  |
| Henan Province | LY   | 21.70 | 62.60 | 40.90 | 40.08 | 10.46 |
| Henan Province | PDS  | 24.60 | 64.50 | 39.90 | 51.43 | 8.51  |
| Henan Province | AY   | 27.70 | 72.10 | 44.40 | 56.74 | 8.16  |
| Henan Province | HB   | 39.50 | 66.30 | 26.80 | 56.48 | 3.90  |
| Henan Province | XX   | 26.90 | 64.80 | 37.90 | 57.87 | 5.69  |
| Henan Province | JZ   | 32.20 | 66.90 | 34.70 | 60.06 | 5.13  |
| Henan Province | PY   | 52.90 | 69.70 | 16.80 | 59.43 | 1.74  |
| Henan Province | XC   | 36.70 | 65.00 | 28.30 | 57.58 | 4.46  |
| Henan Province | LH   | 55.40 | 63.90 | 8.50  | 59.38 | 1.49  |
| Henan Province | SMX  | 24.50 | 58.20 | 33.70 | 36.50 | 8.56  |
| Henan Province | NY   | 21.80 | 60.50 | 38.70 | 43.99 | 9.14  |
| Henan Province | SQ   | 50.40 | 63.10 | 12.70 | 56.14 | 2.21  |
| Henan Province | XY   | 26.30 | 53.40 | 27.10 | 43.92 | 5.71  |
| Henan Province | ZK   | 46.50 | 61.00 | 14.50 | 54.21 | 3.00  |
| Henan Province | ZMD  | 38.60 | 60.50 | 21.90 | 50.04 | 3.83  |
| Henan Province | JY   | 27.10 | 64.40 | 37.30 | 49.43 | 6.71  |
| Hubei Province | WH   | 30.10 | 53.80 | 23.70 | 44.11 | 4.37  |
| Hubei Province | HS   | 24.50 | 45.40 | 20.90 | 35.99 | 3.69  |
| Hubei Province | SY   | 18.70 | 43.70 | 25.00 | 29.10 | 4.46  |
| Hubei Province | YC   | 17.50 | 53.30 | 35.80 | 33.88 | 8.95  |
| Hubei Province | XY   | 23.10 | 60.50 | 37.40 | 41.43 | 9.58  |
| Hubei Province | EZ   | 35.40 | 47.30 | 11.90 | 41.84 | 3.07  |
| Hubei Province | JM   | 30.60 | 55.10 | 24.50 | 44.15 | 6.39  |
| Hubei Province | XG   | 33.10 | 53.70 | 20.60 | 43.38 | 4.91  |

**Table S2.** *Cont.*

| Province       | City | MIN   | MAX   | RANGE | MEAN  | STDEV |
|----------------|------|-------|-------|-------|-------|-------|
| Hubei Province | JZ   | 26.50 | 54.30 | 27.80 | 45.75 | 3.48  |
| Hubei Province | HG   | 20.30 | 45.60 | 25.30 | 32.93 | 5.11  |
| Hubei Province | XN   | 23.70 | 50.20 | 26.50 | 33.74 | 4.61  |
| Hubei Province | SZ   | 30.60 | 44.20 | 13.60 | 38.28 | 2.58  |
| Hubei Province | ES   | 18.50 | 37.70 | 19.20 | 26.46 | 3.19  |
| Hubei Province | XT   | 42.50 | 51.30 | 8.80  | 47.81 | 1.55  |
| Hubei Province | QJ   | 42.80 | 49.00 | 6.20  | 45.95 | 1.18  |
| Hubei Province | TM   | 42.50 | 51.40 | 8.90  | 46.30 | 1.60  |
| Hubei Province | SNJ  | 18.30 | 28.40 | 10.10 | 22.76 | 1.49  |
| Hunan Province | CS   | 25.90 | 50.00 | 24.10 | 35.94 | 4.95  |
| Hunan Province | ZZ   | 21.40 | 46.80 | 25.40 | 32.32 | 5.19  |
| Hunan Province | XT   | 29.60 | 48.50 | 18.90 | 39.81 | 4.04  |
| Hunan Province | HY   | 28.60 | 44.40 | 15.80 | 36.22 | 2.80  |
| Hunan Province | SY   | 23.00 | 45.30 | 22.30 | 32.90 | 4.17  |
| Hunan Province | YUY  | 27.80 | 49.70 | 21.90 | 37.48 | 4.82  |
| Hunan Province | CD   | 20.50 | 49.40 | 28.90 | 36.87 | 5.98  |
| Hunan Province | ZJJ  | 20.40 | 40.10 | 19.70 | 28.14 | 3.68  |
| Hunan Province | YIY  | 25.90 | 47.10 | 21.20 | 34.03 | 6.03  |
| Hunan Province | CZ   | 21.40 | 36.50 | 15.10 | 28.43 | 3.23  |
| Hunan Province | YZ   | 25.90 | 46.30 | 20.40 | 34.33 | 4.14  |
| Hunan Province | HY   | 23.40 | 36.50 | 13.10 | 29.20 | 2.16  |
| Hunan Province | LD   | 26.60 | 42.20 | 15.60 | 33.79 | 3.26  |
| Hunan Province | XX   | 21.00 | 34.10 | 13.10 | 25.72 | 2.16  |

**Table S3.** The relevant statistical analysis of the annual concentrations of PM<sub>2.5</sub> in 2018 in Henan Province, Hubei Province and Hunan Province.

| Province       | City | MIN   | MAX   | RANGE | MEAN  | STDEV |
|----------------|------|-------|-------|-------|-------|-------|
| Henan Province | ZZ   | 34.20 | 64.30 | 30.10 | 52.77 | 7.12  |
| Henan Province | KF   | 51.30 | 65.80 | 14.50 | 57.87 | 2.92  |
| Henan Province | LY   | 20.60 | 63.30 | 42.70 | 39.21 | 10.59 |
| Henan Province | PDS  | 24.60 | 60.80 | 36.20 | 49.98 | 7.39  |
| Henan Province | AY   | 27.80 | 72.00 | 44.20 | 57.10 | 8.52  |
| Henan Province | HB   | 41.60 | 66.70 | 25.10 | 58.28 | 4.61  |
| Henan Province | XX   | 27.70 | 62.50 | 34.80 | 56.26 | 5.42  |
| Henan Province | JZ   | 34.20 | 64.40 | 30.20 | 57.22 | 4.75  |
| Henan Province | PY   | 53.00 | 70.50 | 17.50 | 60.31 | 2.29  |
| Henan Province | XC   | 37.80 | 61.80 | 24.00 | 55.15 | 4.08  |
| Henan Province | LH   | 52.10 | 61.60 | 9.50  | 56.81 | 1.49  |
| Henan Province | SMX  | 24.10 | 56.80 | 32.70 | 35.12 | 8.47  |
| Henan Province | NY   | 20.80 | 57.90 | 37.10 | 42.53 | 8.59  |

**Table S3.** *Cont.*

| Province       | City | MIN   | MAX   | RANGE | MEAN  | STDEV |
|----------------|------|-------|-------|-------|-------|-------|
| Henan Province | SQ   | 49.70 | 62.40 | 12.70 | 55.28 | 2.19  |
| Henan Province | XY   | 24.90 | 50.10 | 25.20 | 40.92 | 5.41  |
| Henan Province | ZK   | 46.20 | 58.50 | 12.30 | 52.39 | 2.15  |
| Henan Province | ZMD  | 35.50 | 57.80 | 22.30 | 47.70 | 3.92  |
| Henan Province | JY   | 29.60 | 59.70 | 30.10 | 47.63 | 5.94  |
| Hubei Province | WH   | 30.80 | 50.50 | 19.70 | 43.31 | 3.78  |
| Hubei Province | HS   | 26.40 | 45.40 | 19.00 | 37.27 | 3.39  |
| Hubei Province | SY   | 19.10 | 42.30 | 23.20 | 28.67 | 4.25  |
| Hubei Province | YC   | 18.80 | 55.00 | 36.20 | 35.11 | 9.23  |
| Hubei Province | XY   | 23.10 | 60.00 | 36.90 | 40.95 | 9.24  |
| Hubei Province | EZ   | 35.70 | 46.60 | 10.90 | 41.80 | 2.75  |
| Hubei Province | JM   | 32.10 | 57.50 | 25.40 | 46.79 | 6.28  |
| Hubei Province | XG   | 32.80 | 53.60 | 20.80 | 43.60 | 5.33  |
| Hubei Province | JZ   | 27.90 | 54.40 | 26.50 | 46.19 | 3.19  |
| Hubei Province | HG   | 20.20 | 48.00 | 27.80 | 33.24 | 5.39  |
| Hubei Province | XN   | 25.30 | 49.90 | 24.60 | 34.39 | 4.32  |
| Hubei Province | SZ   | 31.80 | 42.90 | 11.10 | 37.12 | 2.28  |
| Hubei Province | ES   | 19.40 | 37.70 | 18.30 | 26.25 | 2.78  |
| Hubei Province | XT   | 45.20 | 51.10 | 5.90  | 47.83 | 1.12  |
| Hubei Province | QJ   | 43.70 | 49.30 | 5.60  | 47.22 | 0.72  |
| Hubei Province | TM   | 45.20 | 51.70 | 6.50  | 48.54 | 1.08  |
| Hubei Province | SNJ  | 18.80 | 28.50 | 9.70  | 22.53 | 1.27  |
| Hunan Province | CS   | 25.80 | 50.90 | 25.10 | 38.07 | 5.33  |
| Hunan Province | ZZ   | 19.30 | 48.70 | 29.40 | 32.06 | 6.47  |
| Hunan Province | XT   | 33.60 | 50.20 | 16.60 | 42.50 | 3.57  |
| Hunan Province | HY   | 28.20 | 45.10 | 16.90 | 37.39 | 2.84  |
| Hunan Province | SY   | 23.70 | 45.30 | 21.60 | 32.76 | 3.99  |
| Hunan Province | YUY  | 28.00 | 49.60 | 21.60 | 39.16 | 5.15  |
| Hunan Province | CD   | 21.20 | 49.80 | 28.60 | 38.46 | 6.40  |
| Hunan Province | ZJJ  | 20.70 | 39.60 | 18.90 | 28.30 | 3.63  |
| Hunan Province | YIY  | 27.10 | 49.60 | 22.50 | 37.80 | 6.73  |
| Hunan Province | CZ   | 19.20 | 36.80 | 17.60 | 27.75 | 4.31  |
| Hunan Province | YZ   | 24.40 | 44.50 | 20.10 | 33.25 | 4.07  |
| Hunan Province | HY   | 23.70 | 35.80 | 12.10 | 29.83 | 2.00  |
| Hunan Province | LD   | 25.60 | 43.40 | 17.80 | 35.49 | 3.56  |
| Hunan Province | XX   | 21.50 | 34.00 | 12.50 | 26.16 | 1.94  |

**Supplementary Instructions:**

Henan Province: Zhengzhou-ZZ, Kaifeng-KF, Luoyang-LY, Pingdingshan-PDS, Anyang-Ay, Hebi-HB, Xinxiang-XX, Jiaozuo-JZ, Puyang-PY, Xuchang-XC, Luohe-LH, Sanmenxia-

SMX, Nanyang-NY, Shangqiu-SQ, Xinyang-XY, Zhoukou-ZK, Zhumadian-ZMD, Jiyuan-JY.

Hubei Province: Wuhan-WH, Huangshi-HS, Shiyan-SY, Yichang-YC, Xiangyang-XY, Ezhou-EZ, Jingmen-JM, Xiaogan-XG, Jingzhou-JZ, Huanggan-HG, Xianning-XN, Suizhou-SZ, Enshi-ES, Xiantao-XT, Qianjiang-QJ, Tianmen-TM, Shennongjia-SNJ.

Hunan Province: Changsha-CS, Zhuzhou-ZZ, Xiangtan-XT, Hengyang-HY, Shaoyang-SY, Yueyang-YUY, Changde-CD, Zhangjiajie-ZJJ, Yiyang-YIY, Chenzhou-CZ, Yongzhou-YZ, Huaihua-HH, Loudi-LD, Xiangxi-XX.

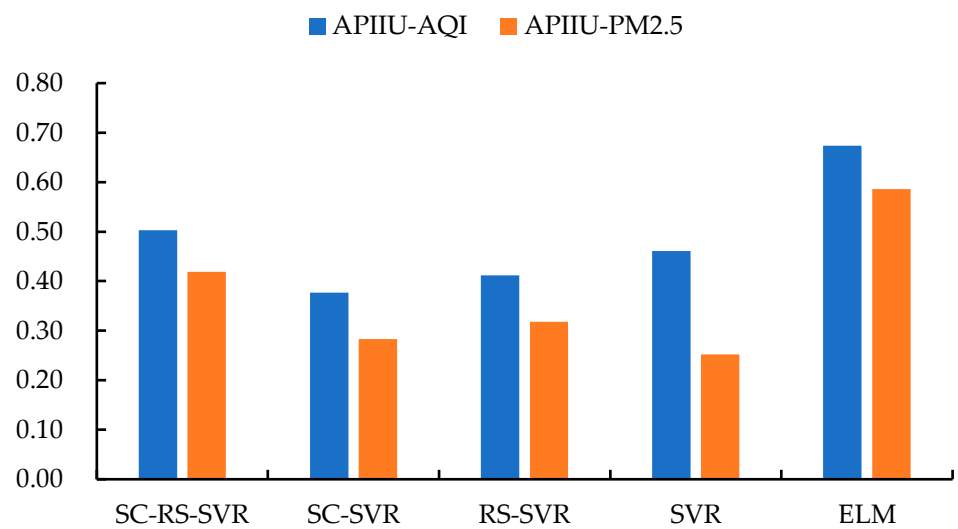

**Figure S1.** Comparison of  $R^2$  of SC-RS-SVR model, SC-SVR model, RS-SVR model, SVR model and ELM model.

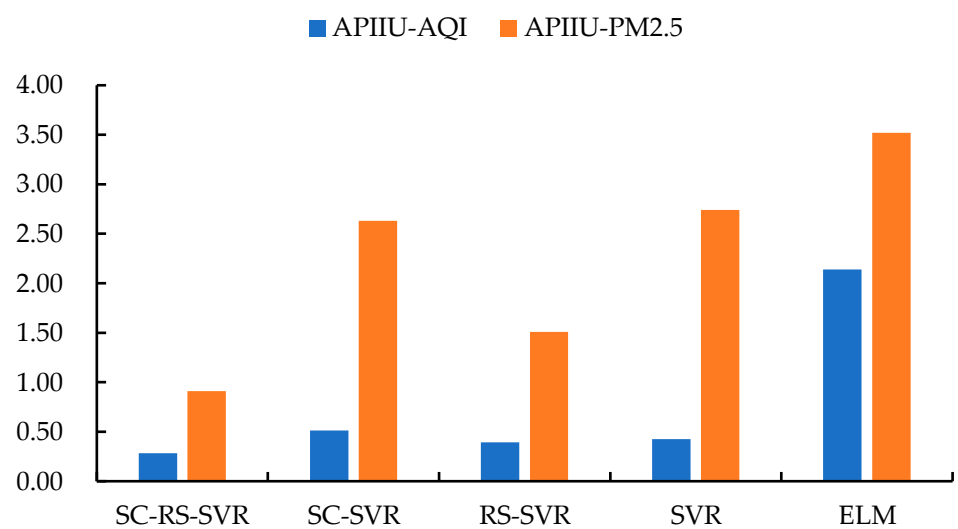

**Figure S2.** Comparison of RMSE of SC-RS-SVR model, SC-SVR model, RS-SVR model, SVR model and ELM model.

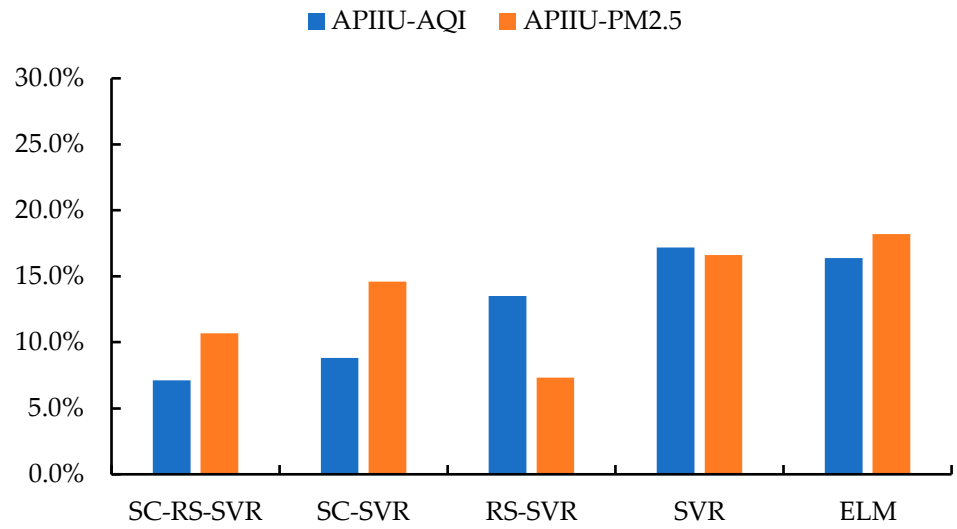

**Figure S3.** Comparison of MAPE of SC-RS-SVR model, SC-SVR model, RS-SVR model, SVR model and ELM model.
